# Supplementary material for: Backward alpha band oscillations shape perceptual bias under probabilistic cues
Source: Springer Nature journal article supplement (doi:10.1038/s42003-026-09559-1), 2026-01-21
Supplement: MOESM1 [file 42003_2026_9559_MOESM1_ESM.pdf]

### Supplementary materials

|             | LOW PROBABILITY     | MEDIUM PROBABILITY  | HIGH PROBABILITY    |
|-------------|---------------------|---------------------|---------------------|
| HIT RATE    | M = 0.52, SD = 0.21 | M = 0.62, SD = 0.18 | M = 0.73, SD = 0.17 |
| FALSE ALARM | M = 0.12, SD = 0.09 | M = 0.17, SD = 0.12 | M = 0.29, SD = 0.18 |

**Supplementary Table 1. Descriptive statistics for Hit Rate (HR) and False Alarms (FA) across cue probabilities**

To assess how cue probability influenced detection performance, we computed, for each participant, *hit rate* (HR) defined as the proportion of correct responses on target-present trials, and *false alarm rate* (FA), the proportion of “yes” responses on target-absent trials. Both measures were submitted to within-subjects repeated-measures ANOVAs with Cue probability (three levels: low, medium, high) as a factor. The analysis revealed a robust main effect of cue probability on HR,  $F_{2,158} = 74.52$ ,  $p < .001$ , indicating that participants' detection report increased as cue probability increased. Post-hoc comparisons confirmed that HR was significantly higher for medium cues ( $M = 0.62$ ,  $SD = 0.18$ ) than for low cues ( $M = 0.52$ ,  $SD = 0.21$ ), and further increased for high cues ( $M = 0.73$ ,  $SD = 0.17$ , all  $p < 0.01$ ). A similar pattern emerged for false alarms, with a significant main effect of cue ( $F_{2,158} = 65.63$ ,  $p < 0.01$ ). FA rates increased from low ( $M = 0.12$ ,  $SD = 0.09$ ) to medium ( $M = 0.17$ ,  $SD = 0.12$ ) and high cue probabilities ( $M = 0.29$ ,  $SD = 0.18$ , all  $p < 0.01$ ), indicating that participants adopted a progressively more liberal response criterion as the likelihood of target presence increased.

**HEMISPHERE \* LINE \* CUE \* CRITERION SHIFT ~ BW ALPHA WAVES**

| Cases                               | Sum of Squares                      | df             | Mean Square                         | F                  | p                   | $\eta^2$               |
|-------------------------------------|-------------------------------------|----------------|-------------------------------------|--------------------|---------------------|------------------------|
| HEMI                                | 9.877×10 <sup>-4</sup>              | 1              | 9.877×10 <sup>-4</sup>              | 0.017              | 0.896               | 2.207×10 <sup>-4</sup> |
| HEMI * CRITERION SHIFT              | 0.184                               | 1              | 0.184                               | 3.217              | 0.077               | 0.040                  |
| Residuals                           | 4.474                               | 78             | 0.057                               |                    |                     |                        |
| LINE                                | 0.291 <sup>a</sup>                  | 3 <sup>a</sup> | 0.097 <sup>a</sup>                  | 1.830 <sup>a</sup> | 0.142 <sup>a</sup>  | 0.023                  |
| LINE * CRITERION SHIFT              | 0.149 <sup>a</sup>                  | 3 <sup>a</sup> | 0.050 <sup>a</sup>                  | 0.938 <sup>a</sup> | 0.423 <sup>a</sup>  | 0.012                  |
| Residuals                           | 12.392                              | 234            | 0.053                               |                    |                     |                        |
| CUE                                 | 0.047                               | 2              | 0.024                               | 3.330              | 0.038               | 0.041                  |
| CUE * CRITERION SHIFT               | 0.016                               | 2              | 0.008                               | 1.109              | 0.333               | 0.014                  |
| Residuals                           | 1.102                               | 156            | 0.007                               |                    |                     |                        |
| HEMI * LINE                         | 0.277 <sup>a</sup>                  | 3 <sup>a</sup> | 0.092 <sup>a</sup>                  | 6.195 <sup>a</sup> | < .001 <sup>a</sup> | 0.074                  |
| HEMI * LINE * CRITERION SHIFT       | 0.031 <sup>a</sup>                  | 3 <sup>a</sup> | 0.010 <sup>a</sup>                  | 0.685 <sup>a</sup> | 0.562 <sup>a</sup>  | 0.009                  |
| Residuals                           | 3.489                               | 234            | 0.015                               |                    |                     |                        |
| HEMI * CUE                          | 0.014                               | 2              | 0.007                               | 2.653              | 0.074               | 0.033                  |
| HEMI * CUE * CRITERION SHIFT        | 0.025                               | 2              | 0.013                               | 4.946              | 0.008               | 0.060                  |
| Residuals                           | 0.401                               | 156            | 0.003                               |                    |                     |                        |
| LINE * CUE                          | 0.002 <sup>a</sup>                  | 6 <sup>a</sup> | 3.057×10 <sup>-4</sup> <sup>a</sup> | 0.249 <sup>a</sup> | 0.960 <sup>a</sup>  | 0.003                  |
| LINE * CUE * CRITERION SHIFT        | 0.004 <sup>a</sup>                  | 6 <sup>a</sup> | 7.053×10 <sup>-4</sup> <sup>a</sup> | 0.575 <sup>a</sup> | 0.750 <sup>a</sup>  | 0.007                  |
| Residuals                           | 0.574                               | 468            | 0.001                               |                    |                     |                        |
| HEMI * LINE * CUE                   | 0.002 <sup>a</sup>                  | 6 <sup>a</sup> | 2.522×10 <sup>-4</sup> <sup>a</sup> | 0.323 <sup>a</sup> | 0.925 <sup>a</sup>  | 0.004                  |
| HEMI * LINE * CUE * CRITERION SHIFT | 4.374×10 <sup>-4</sup> <sup>a</sup> | 6 <sup>a</sup> | 7.290×10 <sup>-5</sup> <sup>a</sup> | 0.093 <sup>a</sup> | 0.997 <sup>a</sup>  | 0.001                  |
| Residuals                           | 0.366                               | 468            | 7.813×10 <sup>-4</sup>              |                    |                     |                        |

**Supplementary Table 2.**

**HEMISPHERE \* LINE \* CUE \* CRITERION SHIFT ~ FW ALPHA WAVES**

| Cases                                     | Sum of Squares | df  | Mean Square              | F       | p       | $\eta_p^2$             |
|-------------------------------------------|----------------|-----|--------------------------|---------|---------|------------------------|
| HEMISPHERE                                | 0.227          | 1   | 0.227                    | 2.831   | 0.096   | 0.035                  |
| HEMISPHERE * CRITERION SHIFT              | 0.003          | 1   | 0.003                    | 0.032   | 0.859   | $4.081 \times 10^{-4}$ |
| Residuals                                 | 6.267          | 78  | 0.080                    |         |         |                        |
| LINE                                      | 0.927*         | 3*  | 0.309*                   | 5.121*  | 0.002*  | 0.062                  |
| LINE * CRITERION SHIFT                    | 0.034*         | 3*  | 0.011*                   | 0.190*  | 0.903*  | 0.002                  |
| Residuals                                 | 14.112         | 234 | 0.060                    |         |         |                        |
| CUE                                       | 0.030          | 2   | 0.015                    | 1.999   | 0.139   | 0.025                  |
| CUE * CRITERION SHIFT                     | 0.040          | 2   | 0.020                    | 2.666   | 0.073   | 0.033                  |
| Residuals                                 | 1.168          | 156 | 0.007                    |         |         |                        |
| HEMISPHERE * LINE                         | 0.382*         | 3*  | 0.127*                   | 11.442* | < .001* | 0.128                  |
| HEMISPHERE * LINE * CRITERION SHIFT       | 0.057*         | 3*  | 0.019*                   | 1.698*  | 0.168*  | 0.021                  |
| Residuals                                 | 2.606          | 234 | 0.011                    |         |         |                        |
| HEMISPHERE * CUE                          | 0.006          | 2   | 0.003                    | 1.091   | 0.339   | 0.014                  |
| HEMISPHERE * CUE * CRITERION SHIFT        | 0.004          | 2   | 0.002                    | 0.784   | 0.458   | 0.010                  |
| Residuals                                 | 0.436          | 156 | 0.003                    |         |         |                        |
| LINE * CUE                                | 0.007*         | 6*  | 0.001*                   | 0.973*  | 0.443*  | 0.012                  |
| LINE * CUE * CRITERION SHIFT              | 0.003*         | 6*  | $4.638 \times 10^{-4}$ * | 0.364*  | 0.901*  | 0.005                  |
| Residuals                                 | 0.596          | 468 | 0.001                    |         |         |                        |
| HEMISPHERE * LINE * CUE                   | 0.010*         | 6*  | 0.002*                   | 2.332*  | 0.031*  | 0.029                  |
| HEMISPHERE * LINE * CUE * CRITERION SHIFT | 0.005*         | 6*  | $8.268 \times 10^{-4}$ * | 1.208*  | 0.301*  | 0.015                  |
| Residuals                                 | 0.320          | 468 | $6.843 \times 10^{-4}$   |         |         |                        |

**Supplementary Table 3.**

**HEMISPHERE \* LINE \* CUE \* GROUP ~ BW ALPHA WAVES**

| Cases                           | Sum of Squares | df  | Mean Square              | F       | p       | $\eta_p^2$ |
|---------------------------------|----------------|-----|--------------------------|---------|---------|------------|
| HEMISPHERE                      | 0.185          | 1   | 0.185                    | 3.440   | 0.067   | 0.042      |
| HEMISPHERE * GROUP              | 0.471          | 1   | 0.471                    | 8.779   | 0.004   | 0.101      |
| Residuals                       | 4.187          | 78  | 0.054                    |         |         |            |
| LINE                            | 0.924*         | 3*  | 0.308*                   | 5.761*  | < .001* | 0.069      |
| LINE * GROUP                    | 0.026*         | 3*  | 0.009*                   | 0.163*  | 0.921*  | 0.002      |
| Residuals                       | 12.515         | 234 | 0.053                    |         |         |            |
| CUE                             | 0.034          | 2   | 0.017                    | 2.410   | 0.093   | 0.030      |
| CUE * GROUP                     | 0.003          | 2   | 0.002                    | 0.210   | 0.811   | 0.003      |
| Residuals                       | 1.115          | 156 | 0.007                    |         |         |            |
| HEMISPHERE * LINE               | 0.451*         | 3*  | 0.150*                   | 10.145* | < .001* | 0.115      |
| HEMISPHERE * LINE * GROUP       | 0.050*         | 3*  | 0.017*                   | 1.134*  | 0.336*  | 0.014      |
| Residuals                       | 3.469          | 234 | 0.015                    |         |         |            |
| HEMISPHERE * CUE                | 0.002          | 2   | 0.001                    | 0.416   | 0.660   | 0.005      |
| HEMISPHERE * CUE * GROUP        | 0.018          | 2   | 0.009                    | 3.537   | 0.031   | 0.043      |
| Residuals                       | 0.408          | 156 | 0.003                    |         |         |            |
| LINE * CUE                      | 0.012*         | 6*  | 0.002*                   | 1.679*  | 0.124*  | 0.021      |
| LINE * CUE * GROUP              | 0.022*         | 6*  | 0.004*                   | 3.079*  | 0.006*  | 0.038      |
| Residuals                       | 0.556          | 468 | 0.001                    |         |         |            |
| HEMISPHERE * LINE * CUE         | 0.004*         | 6*  | $7.140 \times 10^{-4}$ * | 0.924*  | 0.477*  | 0.012      |
| HEMISPHERE * LINE * CUE * GROUP | 0.004*         | 6*  | $7.453 \times 10^{-4}$ * | 0.965*  | 0.449*  | 0.012      |
| Residuals                       | 0.362          | 468 | $7.727 \times 10^{-4}$   |         |         |            |

**Supplementary Table 4.**

**HEMISPHERE \* LINE \* CUE \* GROUP ~ FW ALPHA WAVES**

| Cases                           | Sum of Squares     | df             | Mean Square             | F                   | p                   | $\eta_p^2$ |
|---------------------------------|--------------------|----------------|-------------------------|---------------------|---------------------|------------|
| HEMISPHERE                      | 0.591              | 1              | 0.591                   | 7.434               | 0.008               | 0.087      |
| HEMISPHERE * GROUP              | 0.071              | 1              | 0.071                   | 0.890               | 0.348               | 0.011      |
| Residuals                       | 6.199              | 78             | 0.079                   |                     |                     |            |
| LINE                            | 2.521 <sup>a</sup> | 3 <sup>a</sup> | 0.840 <sup>a</sup>      | 13.943 <sup>a</sup> | < .001 <sup>a</sup> | 0.152      |
| LINE * GROUP                    | 0.044 <sup>a</sup> | 3 <sup>a</sup> | 0.015 <sup>a</sup>      | 0.242 <sup>a</sup>  | 0.867 <sup>a</sup>  | 0.003      |
| Residuals                       | 14.103             | 234            | 0.060                   |                     |                     |            |
| CUE                             | 0.001              | 2              | 6.933×10 <sup>-4</sup>  | 0.090               | 0.914               | 0.001      |
| CUE * GROUP                     | 0.007              | 2              | 0.004                   | 0.455               | 0.635               | 0.006      |
| Residuals                       | 1.201              | 156            | 0.008                   |                     |                     |            |
| HEMISPHERE * LINE               | 0.866 <sup>a</sup> | 3 <sup>a</sup> | 0.289 <sup>a</sup>      | 25.520 <sup>a</sup> | < .001 <sup>a</sup> | 0.247      |
| HEMISPHERE * LINE * GROUP       | 0.016 <sup>a</sup> | 3 <sup>a</sup> | 0.005 <sup>a</sup>      | 0.479 <sup>a</sup>  | 0.697 <sup>a</sup>  | 0.006      |
| Residuals                       | 2.647              | 234            | 0.011                   |                     |                     |            |
| HEMISPHERE * CUE                | 0.002              | 2              | 9.665×10 <sup>-4</sup>  | 0.354               | 0.703               | 0.005      |
| HEMISPHERE * CUE * GROUP        | 0.014              | 2              | 0.007                   | 2.634               | 0.075               | 0.033      |
| Residuals                       | 0.426              | 156            | 0.003                   |                     |                     |            |
| LINE * CUE                      | 0.019 <sup>a</sup> | 6 <sup>a</sup> | 0.003 <sup>a</sup>      | 2.541 <sup>a</sup>  | 0.020 <sup>a</sup>  | 0.032      |
| LINE * CUE * GROUP              | 0.027 <sup>a</sup> | 6 <sup>a</sup> | 0.004 <sup>a</sup>      | 3.615 <sup>a</sup>  | 0.002 <sup>a</sup>  | 0.044      |
| Residuals                       | 0.572              | 468            | 0.001                   |                     |                     |            |
| HEMISPHERE * LINE * CUE         | 0.006 <sup>a</sup> | 6 <sup>a</sup> | 9.429×10 <sup>-4a</sup> | 1.370 <sup>a</sup>  | 0.225 <sup>a</sup>  | 0.017      |
| HEMISPHERE * LINE * CUE * GROUP | 0.003 <sup>a</sup> | 6 <sup>a</sup> | 5.340×10 <sup>-4a</sup> | 0.776 <sup>a</sup>  | 0.589 <sup>a</sup>  | 0.010      |
| Residuals                       | 0.322              | 468            | 6.880×10 <sup>-4</sup>  |                     |                     |            |

**Supplementary Table 5.**

**HEMISPHERE \* LINE \* CUE \* CRITERION SHIFT ~ BW THETA WAVES**

| Cases                                     | Sum of Squares         | df             | Mean Square             | F                  | p                   | $\eta_p^2$ |
|-------------------------------------------|------------------------|----------------|-------------------------|--------------------|---------------------|------------|
| HEMISPHERE                                | 0.384                  | 1              | 0.384                   | 9.452              | 0.003               | 0.108      |
| HEMISPHERE * CRITERION SHIFT              | 0.089                  | 1              | 0.089                   | 2.192              | 0.143               | 0.027      |
| Residuals                                 | 3.173                  | 78             | 0.041                   |                    |                     |            |
| LINE                                      | 0.402 <sup>a</sup>     | 3 <sup>a</sup> | 0.134 <sup>a</sup>      | 5.260 <sup>a</sup> | 0.002 <sup>a</sup>  | 0.063      |
| LINE * CRITERION SHIFT                    | 0.197 <sup>a</sup>     | 3 <sup>a</sup> | 0.066 <sup>a</sup>      | 2.576 <sup>a</sup> | 0.055 <sup>a</sup>  | 0.032      |
| Residuals                                 | 5.968                  | 234            | 0.026                   |                    |                     |            |
| CUE                                       | 0.008 <sup>a</sup>     | 2 <sup>a</sup> | 0.004 <sup>a</sup>      | 0.763 <sup>a</sup> | 0.468 <sup>a</sup>  | 0.010      |
| CUE * CRITERION SHIFT                     | 0.002 <sup>a</sup>     | 2 <sup>a</sup> | 9.347×10 <sup>-4a</sup> | 0.177 <sup>a</sup> | 0.838 <sup>a</sup>  | 0.002      |
| Residuals                                 | 0.822                  | 156            | 0.005                   |                    |                     |            |
| HEMISPHERE * LINE                         | 0.290 <sup>a</sup>     | 3 <sup>a</sup> | 0.097 <sup>a</sup>      | 9.029 <sup>a</sup> | < .001 <sup>a</sup> | 0.104      |
| HEMISPHERE * LINE * CRITERION SHIFT       | 0.024 <sup>a</sup>     | 3 <sup>a</sup> | 0.008 <sup>a</sup>      | 0.760 <sup>a</sup> | 0.518 <sup>a</sup>  | 0.010      |
| Residuals                                 | 2.506                  | 234            | 0.011                   |                    |                     |            |
| HEMISPHERE * CUE                          | 9.666×10 <sup>-4</sup> | 2              | 4.833×10 <sup>-4</sup>  | 0.177              | 0.838               | 0.002      |
| HEMISPHERE * CUE * CRITERION SHIFT        | 0.004                  | 2              | 0.002                   | 0.786              | 0.458               | 0.010      |
| Residuals                                 | 0.426                  | 156            | 0.003                   |                    |                     |            |
| LINE * CUE                                | 0.002 <sup>a</sup>     | 6 <sup>a</sup> | 3.674×10 <sup>-4a</sup> | 0.302 <sup>a</sup> | 0.936 <sup>a</sup>  | 0.004      |
| LINE * CUE * CRITERION SHIFT              | 0.004 <sup>a</sup>     | 6 <sup>a</sup> | 7.274×10 <sup>-4a</sup> | 0.598 <sup>a</sup> | 0.732 <sup>a</sup>  | 0.008      |
| Residuals                                 | 0.570                  | 468            | 0.001                   |                    |                     |            |
| HEMISPHERE * LINE * CUE                   | 0.002 <sup>a</sup>     | 6 <sup>a</sup> | 3.625×10 <sup>-4a</sup> | 0.489 <sup>a</sup> | 0.817 <sup>a</sup>  | 0.006      |
| HEMISPHERE * LINE * CUE * CRITERION SHIFT | 0.002 <sup>a</sup>     | 6 <sup>a</sup> | 3.554×10 <sup>-4a</sup> | 0.479 <sup>a</sup> | 0.824 <sup>a</sup>  | 0.006      |
| Residuals                                 | 0.347                  | 468            | 7.413×10 <sup>-4</sup>  |                    |                     |            |

**Supplementary Table 6.**

### HEMISPHERE \* LINE \* CUE \* CRITERION SHIFT ~ FW THETA WAVES

| Cases                                     | Sum of Squares     | df             | Mean Square             | F                   | p                   | $\eta_p^2$ |
|-------------------------------------------|--------------------|----------------|-------------------------|---------------------|---------------------|------------|
| HEMISPHERE                                | 0.293              | 1              | 0.293                   | 4.581               | 0.035               | 0.055      |
| HEMISPHERE * CRITERION SHIFT              | 0.043              | 1              | 0.043                   | 0.675               | 0.414               | 0.009      |
| Residuals                                 | 4.995              | 78             | 0.064                   |                     |                     |            |
| LINE                                      | 0.994 <sup>a</sup> | 3 <sup>a</sup> | 0.331 <sup>a</sup>      | 10.525 <sup>a</sup> | < .001 <sup>a</sup> | 0.119      |
| LINE * CRITERION SHIFT                    | 0.026 <sup>a</sup> | 3 <sup>a</sup> | 0.009 <sup>a</sup>      | 0.272 <sup>a</sup>  | 0.845 <sup>a</sup>  | 0.003      |
| Residuals                                 | 7.368              | 234            | 0.031                   |                     |                     |            |
| CUE                                       | 0.004              | 2              | 0.002                   | 0.353               | 0.703               | 0.005      |
| CUE * CRITERION SHIFT                     | 0.003              | 2              | 0.001                   | 0.283               | 0.754               | 0.004      |
| Residuals                                 | 0.777              | 156            | 0.005                   |                     |                     |            |
| HEMISPHERE * LINE                         | 0.380 <sup>a</sup> | 3 <sup>a</sup> | 0.127 <sup>a</sup>      | 12.706 <sup>a</sup> | < .001 <sup>a</sup> | 0.140      |
| HEMISPHERE * LINE * CRITERION SHIFT       | 0.047 <sup>a</sup> | 3 <sup>a</sup> | 0.016 <sup>a</sup>      | 1.577 <sup>a</sup>  | 0.196 <sup>a</sup>  | 0.020      |
| Residuals                                 | 2.335              | 234            | 0.010                   |                     |                     |            |
| HEMISPHERE * CUE                          | 0.003              | 2              | 0.002                   | 0.586               | 0.558               | 0.007      |
| HEMISPHERE * CUE * CRITERION SHIFT        | 0.002              | 2              | 8.877×10 <sup>-4</sup>  | 0.330               | 0.719               | 0.004      |
| Residuals                                 | 0.420              | 156            | 0.003                   |                     |                     |            |
| LINE * CUE                                | 0.003 <sup>a</sup> | 6 <sup>a</sup> | 5.627×10 <sup>-4a</sup> | 0.458 <sup>a</sup>  | 0.839 <sup>a</sup>  | 0.006      |
| LINE * CUE * CRITERION SHIFT              | 0.008 <sup>a</sup> | 6 <sup>a</sup> | 0.001 <sup>a</sup>      | 1.099 <sup>a</sup>  | 0.362 <sup>a</sup>  | 0.014      |
| Residuals                                 | 0.574              | 468            | 0.001                   |                     |                     |            |
| HEMISPHERE * LINE * CUE                   | 0.005 <sup>a</sup> | 6 <sup>a</sup> | 7.541×10 <sup>-4a</sup> | 0.976 <sup>a</sup>  | 0.441 <sup>a</sup>  | 0.012      |
| HEMISPHERE * LINE * CUE * CRITERION SHIFT | 0.005 <sup>a</sup> | 6 <sup>a</sup> | 8.844×10 <sup>-4a</sup> | 1.145 <sup>a</sup>  | 0.335 <sup>a</sup>  | 0.014      |
| Residuals                                 | 0.362              | 468            | 7.725×10 <sup>-4</sup>  |                     |                     |            |

**Supplementary Table 7.**

**HEMISPHERE \* LINE \* CUE \* GROUP ~ BW THETA WAVES**

| Cases                           | Sum of Squares     | df             | Mean Square             | F                   | p                   | $\eta^2$ |
|---------------------------------|--------------------|----------------|-------------------------|---------------------|---------------------|----------|
| HEMISPHERE                      | 0.354              | 1              | 0.354                   | 8.506               | 0.005               | 0.098    |
| HEMISPHERE * GROUP              | 0.017              | 1              | 0.017                   | 0.401               | 0.528               | 0.005    |
| Residuals                       | 3.245              | 78             | 0.042                   |                     |                     |          |
| LINE                            | 0.232 <sup>a</sup> | 3 <sup>a</sup> | 0.077 <sup>a</sup>      | 2.994 <sup>a</sup>  | 0.032 <sup>a</sup>  | 0.037    |
| LINE * GROUP                    | 0.113 <sup>a</sup> | 3 <sup>a</sup> | 0.038 <sup>a</sup>      | 1.452 <sup>a</sup>  | 0.228 <sup>a</sup>  | 0.018    |
| Residuals                       | 6.053              | 234            | 0.026                   |                     |                     |          |
| CUE                             | 0.014 <sup>a</sup> | 2 <sup>a</sup> | 0.007 <sup>a</sup>      | 1.296 <sup>a</sup>  | 0.276 <sup>a</sup>  | 0.016    |
| CUE * GROUP                     | 0.009 <sup>a</sup> | 2 <sup>a</sup> | 0.004 <sup>a</sup>      | 0.840 <sup>a</sup>  | 0.434 <sup>a</sup>  | 0.011    |
| Residuals                       | 0.815              | 156            | 0.005                   |                     |                     |          |
| HEMISPHERE * LINE               | 0.506 <sup>a</sup> | 3 <sup>a</sup> | 0.169 <sup>a</sup>      | 15.756 <sup>a</sup> | < .001 <sup>a</sup> | 0.168    |
| HEMISPHERE * LINE * GROUP       | 0.025 <sup>a</sup> | 3 <sup>a</sup> | 0.008 <sup>a</sup>      | 0.766 <sup>a</sup>  | 0.514 <sup>a</sup>  | 0.010    |
| Residuals                       | 2.506              | 234            | 0.011                   |                     |                     |          |
| HEMISPHERE * CUE                | 0.014              | 2              | 0.007                   | 2.513               | 0.084               | 0.031    |
| HEMISPHERE * CUE * GROUP        | 0.006              | 2              | 0.003                   | 1.048               | 0.353               | 0.013    |
| Residuals                       | 0.425              | 156            | 0.003                   |                     |                     |          |
| LINE * CUE                      | 0.004 <sup>a</sup> | 6 <sup>a</sup> | 6.170×10 <sup>-4a</sup> | 0.508 <sup>a</sup>  | 0.803 <sup>a</sup>  | 0.006    |
| LINE * CUE * GROUP              | 0.005 <sup>a</sup> | 6 <sup>a</sup> | 8.922×10 <sup>-4a</sup> | 0.734 <sup>a</sup>  | 0.622 <sup>a</sup>  | 0.009    |
| Residuals                       | 0.569              | 468            | 0.001                   |                     |                     |          |
| HEMISPHERE * LINE * CUE         | 0.004 <sup>a</sup> | 6 <sup>a</sup> | 6.786×10 <sup>-4a</sup> | 0.918 <sup>a</sup>  | 0.481 <sup>a</sup>  | 0.012    |
| HEMISPHERE * LINE * CUE * GROUP | 0.003 <sup>a</sup> | 6 <sup>a</sup> | 5.436×10 <sup>-4a</sup> | 0.736 <sup>a</sup>  | 0.621 <sup>a</sup>  | 0.009    |
| Residuals                       | 0.346              | 468            | 7.389×10 <sup>-4</sup>  |                     |                     |          |

**Supplementary Table 8.**

**HEMISPHERE \* LINE \* CUE \* GROUP ~ FW THETA WAVES**

| Cases                           | Sum of Squares     | df             | Mean Square             | F                   | p                   | $\eta^2$ |
|---------------------------------|--------------------|----------------|-------------------------|---------------------|---------------------|----------|
| HEMISPHERE                      | 1.081              | 1              | 1.081                   | 16.930              | < .001              | 0.178    |
| HEMISPHERE * GROUP              | 0.056              | 1              | 0.056                   | 0.880               | 0.351               | 0.011    |
| Residuals                       | 4.982              | 78             | 0.064                   |                     |                     |          |
| LINE                            | 2.553 <sup>a</sup> | 3 <sup>a</sup> | 0.851 <sup>a</sup>      | 27.465 <sup>a</sup> | < .001 <sup>a</sup> | 0.260    |
| LINE * GROUP                    | 0.142 <sup>a</sup> | 3 <sup>a</sup> | 0.047 <sup>a</sup>      | 1.530 <sup>a</sup>  | 0.207 <sup>a</sup>  | 0.019    |
| Residuals                       | 7.251              | 234            | 0.031                   |                     |                     |          |
| CUE                             | 0.003              | 2              | 0.002                   | 0.318               | 0.728               | 0.004    |
| CUE * GROUP                     | 0.006              | 2              | 0.003                   | 0.593               | 0.554               | 0.008    |
| Residuals                       | 0.774              | 156            | 0.005                   |                     |                     |          |
| HEMISPHERE * LINE               | 0.836 <sup>a</sup> | 3 <sup>a</sup> | 0.279 <sup>a</sup>      | 27.429 <sup>a</sup> | < .001 <sup>a</sup> | 0.260    |
| HEMISPHERE * LINE * GROUP       | 0.004 <sup>a</sup> | 3 <sup>a</sup> | 0.001 <sup>a</sup>      | 0.132 <sup>a</sup>  | 0.941 <sup>a</sup>  | 0.002    |
| Residuals                       | 2.378              | 234            | 0.010                   |                     |                     |          |
| HEMISPHERE * CUE                | 0.004              | 2              | 0.002                   | 0.854               | 0.428               | 0.011    |
| HEMISPHERE * CUE * GROUP        | 0.014              | 2              | 0.007                   | 2.679               | 0.072               | 0.033    |
| Residuals                       | 0.407              | 156            | 0.003                   |                     |                     |          |
| LINE * CUE                      | 0.003 <sup>a</sup> | 6 <sup>a</sup> | 4.678×10 <sup>-4a</sup> | 0.380 <sup>a</sup>  | 0.892 <sup>a</sup>  | 0.005    |
| LINE * CUE * GROUP              | 0.006 <sup>a</sup> | 6 <sup>a</sup> | 0.001 <sup>a</sup>      | 0.828 <sup>a</sup>  | 0.548 <sup>a</sup>  | 0.011    |
| Residuals                       | 0.576              | 468            | 0.001                   |                     |                     |          |
| HEMISPHERE * LINE * CUE         | 0.006 <sup>a</sup> | 6 <sup>a</sup> | 0.001 <sup>a</sup>      | 1.321 <sup>a</sup>  | 0.246 <sup>a</sup>  | 0.017    |
| HEMISPHERE * LINE * CUE * GROUP | 0.005 <sup>a</sup> | 6 <sup>a</sup> | 7.517×10 <sup>-4a</sup> | 0.971 <sup>a</sup>  | 0.444 <sup>a</sup>  | 0.012    |
| Residuals                       | 0.362              | 468            | 7.742×10 <sup>-4</sup>  |                     |                     |          |

**Supplementary Table 9.**

**HEMISPHERE \* LINE \* CUE \* CRITERION SHIFT ~ BW BETA WAVES**

| Cases                                     | Sum of Squares     | df             | Mean Square             | F                   | p                   | $\eta^2$ |
|-------------------------------------------|--------------------|----------------|-------------------------|---------------------|---------------------|----------|
| HEMISPHERE                                | 0.022              | 1              | 0.022                   | 0.900               | 0.346               | 0.011    |
| HEMISPHERE * CRITERION SHIFT              | 0.039              | 1              | 0.039                   | 1.606               | 0.209               | 0.020    |
| Residuals                                 | 1.900              | 78             | 0.024                   |                     |                     |          |
| LINE                                      | 1.350 <sup>a</sup> | 3 <sup>a</sup> | 0.450 <sup>a</sup>      | 14.397 <sup>a</sup> | < .001 <sup>a</sup> | 0.156    |
| LINE * CRITERION SHIFT                    | 0.203 <sup>a</sup> | 3 <sup>a</sup> | 0.068 <sup>a</sup>      | 2.164 <sup>a</sup>  | 0.093 <sup>a</sup>  | 0.027    |
| Residuals                                 | 7.316              | 234            | 0.031                   |                     |                     |          |
| CUE                                       | 0.010              | 2              | 0.005                   | 1.803               | 0.168               | 0.023    |
| CUE * CRITERION SHIFT                     | 0.003              | 2              | 0.002                   | 0.605               | 0.547               | 0.008    |
| Residuals                                 | 0.441              | 156            | 0.003                   |                     |                     |          |
| HEMISPHERE * LINE                         | 0.172 <sup>a</sup> | 3 <sup>a</sup> | 0.057 <sup>a</sup>      | 3.507 <sup>a</sup>  | 0.016 <sup>a</sup>  | 0.043    |
| HEMISPHERE * LINE * CRITERION SHIFT       | 0.010 <sup>a</sup> | 3 <sup>a</sup> | 0.003 <sup>a</sup>      | 0.203 <sup>a</sup>  | 0.894 <sup>a</sup>  | 0.003    |
| Residuals                                 | 3.816              | 234            | 0.016                   |                     |                     |          |
| HEMISPHERE * CUE                          | 0.002              | 2              | 0.001                   | 0.779               | 0.461               | 0.010    |
| HEMISPHERE * CUE * CRITERION SHIFT        | 0.007              | 2              | 0.004                   | 2.494               | 0.086               | 0.031    |
| Residuals                                 | 0.232              | 156            | 0.001                   |                     |                     |          |
| LINE * CUE                                | 0.012 <sup>a</sup> | 6 <sup>a</sup> | 0.002 <sup>a</sup>      | 2.781 <sup>a</sup>  | 0.011 <sup>a</sup>  | 0.034    |
| LINE * CUE * CRITERION SHIFT              | 0.008 <sup>a</sup> | 6 <sup>a</sup> | 0.001 <sup>a</sup>      | 2.015 <sup>a</sup>  | 0.062 <sup>a</sup>  | 0.025    |
| Residuals                                 | 0.323              | 468            | 6.901×10 <sup>-4</sup>  |                     |                     |          |
| HEMISPHERE * LINE * CUE                   | 0.002 <sup>a</sup> | 6 <sup>a</sup> | 3.392×10 <sup>-4a</sup> | 0.655 <sup>a</sup>  | 0.686 <sup>a</sup>  | 0.008    |
| HEMISPHERE * LINE * CUE * CRITERION SHIFT | 0.001 <sup>a</sup> | 6 <sup>a</sup> | 2.373×10 <sup>-4a</sup> | 0.458 <sup>a</sup>  | 0.839 <sup>a</sup>  | 0.006    |
| Residuals                                 | 0.242              | 468            | 5.177×10 <sup>-4</sup>  |                     |                     |          |

**Supplementary Table 10.**

**HEMISPHERE \* LINE \* CUE \* CRITERION SHIFT ~ FW BETA WAVES**

| Cases                                     | Sum of Squares          | df             | Mean Square             | F                   | p                   | $\eta^2$ |
|-------------------------------------------|-------------------------|----------------|-------------------------|---------------------|---------------------|----------|
| HEMISPHERE                                | 0.201                   | 1              | 0.201                   | 5.649               | 0.020               | 0.068    |
| HEMISPHERE * CRITERION SHIFT              | 0.022                   | 1              | 0.022                   | 0.613               | 0.436               | 0.008    |
| Residuals                                 | 2.780                   | 78             | 0.036                   |                     |                     |          |
| LINE                                      | 1.174 <sup>a</sup>      | 3 <sup>a</sup> | 0.391 <sup>a</sup>      | 15.592 <sup>a</sup> | < .001 <sup>a</sup> | 0.167    |
| LINE * CRITERION SHIFT                    | 0.040 <sup>a</sup>      | 3 <sup>a</sup> | 0.013 <sup>a</sup>      | 0.525 <sup>a</sup>  | 0.665 <sup>a</sup>  | 0.007    |
| Residuals                                 | 5.871                   | 234            | 0.025                   |                     |                     |          |
| CUE                                       | 0.008                   | 2              | 0.004                   | 1.384               | 0.254               | 0.017    |
| CUE * CRITERION SHIFT                     | 9.872×10 <sup>-4</sup>  | 2              | 4.936×10 <sup>-4</sup>  | 0.162               | 0.850               | 0.002    |
| Residuals                                 | 0.474                   | 156            | 0.003                   |                     |                     |          |
| HEMISPHERE * LINE                         | 0.227 <sup>a</sup>      | 3 <sup>a</sup> | 0.076 <sup>a</sup>      | 5.606 <sup>a</sup>  | < .001 <sup>a</sup> | 0.067    |
| HEMISPHERE * LINE * CRITERION SHIFT       | 0.005 <sup>a</sup>      | 3 <sup>a</sup> | 0.002 <sup>a</sup>      | 0.130 <sup>a</sup>  | 0.942 <sup>a</sup>  | 0.002    |
| Residuals                                 | 3.154                   | 234            | 0.013                   |                     |                     |          |
| HEMISPHERE * CUE                          | 2.780×10 <sup>-4</sup>  | 2              | 1.390×10 <sup>-4</sup>  | 0.085               | 0.918               | 0.001    |
| HEMISPHERE * CUE * CRITERION SHIFT        | 0.001                   | 2              | 5.258×10 <sup>-4</sup>  | 0.322               | 0.725               | 0.004    |
| Residuals                                 | 0.255                   | 156            | 0.002                   |                     |                     |          |
| LINE * CUE                                | 0.012 <sup>a</sup>      | 6 <sup>a</sup> | 0.002 <sup>a</sup>      | 2.744 <sup>a</sup>  | 0.012 <sup>a</sup>  | 0.034    |
| LINE * CUE * CRITERION SHIFT              | 0.008 <sup>a</sup>      | 6 <sup>a</sup> | 0.001 <sup>a</sup>      | 1.889 <sup>a</sup>  | 0.081 <sup>a</sup>  | 0.024    |
| Residuals                                 | 0.343                   | 468            | 7.332×10 <sup>-4</sup>  |                     |                     |          |
| HEMISPHERE * LINE * CUE                   | 0.003 <sup>a</sup>      | 6 <sup>a</sup> | 4.493×10 <sup>-4a</sup> | 0.735 <sup>a</sup>  | 0.622 <sup>a</sup>  | 0.009    |
| HEMISPHERE * LINE * CUE * CRITERION SHIFT | 9.757×10 <sup>-4a</sup> | 6 <sup>a</sup> | 1.626×10 <sup>-4a</sup> | 0.266 <sup>a</sup>  | 0.953 <sup>a</sup>  | 0.003    |
| Residuals                                 | 0.286                   | 468            | 6.112×10 <sup>-4</sup>  |                     |                     |          |

**Supplementary Table 11.**

**HEMISPHERE \* LINE \* CUE \* GROUP ~ BW BETA WAVES**

| Cases                     | Sum of Squares         | df             | Mean Square             | F                      | p                   | $\eta^2$               |
|---------------------------|------------------------|----------------|-------------------------|------------------------|---------------------|------------------------|
| HEMI                      | 2.706×10 <sup>-6</sup> | 1              | 2.706×10 <sup>-6</sup>  | 1.206×10 <sup>-4</sup> | 0.991               | 1.546×10 <sup>-6</sup> |
| HEMI * GROUP              | 0.189                  | 1              | 0.189                   | 8.398                  | 0.005               | 0.097                  |
| Residuals                 | 1.751                  | 78             | 0.022                   |                        |                     |                        |
| LINE                      | 4.851 <sup>a</sup>     | 3 <sup>a</sup> | 1.617 <sup>a</sup>      | 50.771 <sup>a</sup>    | < .001 <sup>a</sup> | 0.394                  |
| LINE * GROUP              | 0.067 <sup>a</sup>     | 3 <sup>a</sup> | 0.022 <sup>a</sup>      | 0.697 <sup>a</sup>     | 0.554 <sup>a</sup>  | 0.009                  |
| Residuals                 | 7.452                  | 234            | 0.032                   |                        |                     |                        |
| CUE                       | 0.039                  | 2              | 0.019                   | 6.765                  | 0.002               | 0.080                  |
| CUE * GROUP               | 1.547×10 <sup>-4</sup> | 2              | 7.737×10 <sup>-5</sup>  | 0.027                  | 0.973               | 3.481×10 <sup>-4</sup> |
| Residuals                 | 0.444                  | 156            | 0.003                   |                        |                     |                        |
| HEMI * LINE               | 0.324 <sup>a</sup>     | 3 <sup>a</sup> | 0.108 <sup>a</sup>      | 6.859 <sup>a</sup>     | < .001 <sup>a</sup> | 0.081                  |
| HEMI * LINE * GROUP       | 0.138 <sup>a</sup>     | 3 <sup>a</sup> | 0.046 <sup>a</sup>      | 2.926 <sup>a</sup>     | 0.035 <sup>a</sup>  | 0.036                  |
| Residuals                 | 3.688                  | 234            | 0.016                   |                        |                     |                        |
| HEMI * CUE                | 6.956×10 <sup>-4</sup> | 2              | 3.478×10 <sup>-4</sup>  | 0.227                  | 0.797               | 0.003                  |
| HEMI * CUE * GROUP        | 4.956×10 <sup>-6</sup> | 2              | 2.478×10 <sup>-6</sup>  | 0.002                  | 0.998               | 2.073×10 <sup>-5</sup> |
| Residuals                 | 0.239                  | 156            | 0.002                   |                        |                     |                        |
| LINE * CUE                | 0.006 <sup>a</sup>     | 6 <sup>a</sup> | 9.466×10 <sup>-4a</sup> | 1.347 <sup>a</sup>     | 0.235 <sup>a</sup>  | 0.017                  |
| LINE * CUE * GROUP        | 0.002 <sup>a</sup>     | 6 <sup>a</sup> | 4.118×10 <sup>-4a</sup> | 0.586 <sup>a</sup>     | 0.742 <sup>a</sup>  | 0.007                  |
| Residuals                 | 0.329                  | 468            | 7.027×10 <sup>-4</sup>  |                        |                     |                        |
| HEMI * LINE * CUE         | 0.001 <sup>a</sup>     | 6 <sup>a</sup> | 2.417×10 <sup>-4a</sup> | 0.468 <sup>a</sup>     | 0.832 <sup>a</sup>  | 0.006                  |
| HEMI * LINE * CUE * GROUP | 0.002 <sup>a</sup>     | 6 <sup>a</sup> | 3.444×10 <sup>-4a</sup> | 0.667 <sup>a</sup>     | 0.676 <sup>a</sup>  | 0.008                  |
| Residuals                 | 0.242                  | 468            | 5.163×10 <sup>-4</sup>  |                        |                     |                        |

**Supplementary Table 12.**

### HEMISPHERE \* LINE \* CUE \* GROUP ~ FW BETA WAVES

| Cases                           | Sum of Squares         | df             | Mean Square                         | F                   | p                   | $\eta^2$               |
|---------------------------------|------------------------|----------------|-------------------------------------|---------------------|---------------------|------------------------|
| HEMISPHERE                      | 0.696                  | 1              | 0.696                               | 19.381              | < .001              | 0.199                  |
| HEMISPHERE * GROUP              | $6.907 \times 10^{-4}$ | 1              | $6.907 \times 10^{-4}$              | 0.019               | 0.890               | $2.466 \times 10^{-4}$ |
| Residuals                       | 2.801                  | 78             | 0.036                               |                     |                     |                        |
| LINE                            | 1.969 <sup>a</sup>     | 3 <sup>a</sup> | 0.656 <sup>a</sup>                  | 26.062 <sup>a</sup> | < .001 <sup>a</sup> | 0.250                  |
| LINE * GROUP                    | 0.016 <sup>a</sup>     | 3 <sup>a</sup> | 0.005 <sup>a</sup>                  | 0.218 <sup>a</sup>  | 0.884 <sup>a</sup>  | 0.003                  |
| Residuals                       | 5.894                  | 234            | 0.025                               |                     |                     |                        |
| CUE                             | 0.013                  | 2              | 0.006                               | 2.079               | 0.129               | 0.026                  |
| CUE * GROUP                     | $1.209 \times 10^{-4}$ | 2              | $6.047 \times 10^{-5}$              | 0.020               | 0.980               | $2.546 \times 10^{-4}$ |
| Residuals                       | 0.475                  | 156            | 0.003                               |                     |                     |                        |
| HEMISPHERE * LINE               | 0.451 <sup>a</sup>     | 3 <sup>a</sup> | 0.150 <sup>a</sup>                  | 11.484 <sup>a</sup> | < .001 <sup>a</sup> | 0.128                  |
| HEMISPHERE * LINE * GROUP       | 0.094 <sup>a</sup>     | 3 <sup>a</sup> | 0.031 <sup>a</sup>                  | 2.381 <sup>a</sup>  | 0.070 <sup>a</sup>  | 0.030                  |
| Residuals                       | 3.066                  | 234            | 0.013                               |                     |                     |                        |
| HEMISPHERE * CUE                | 0.001                  | 2              | $6.252 \times 10^{-4}$              | 0.382               | 0.683               | 0.005                  |
| HEMISPHERE * CUE * GROUP        | $6.428 \times 10^{-4}$ | 2              | $3.214 \times 10^{-4}$              | 0.196               | 0.822               | 0.003                  |
| Residuals                       | 0.255                  | 156            | 0.002                               |                     |                     |                        |
| LINE * CUE                      | 0.006 <sup>a</sup>     | 6 <sup>a</sup> | 0.001 <sup>a</sup>                  | 1.363 <sup>a</sup>  | 0.228 <sup>a</sup>  | 0.017                  |
| LINE * CUE * GROUP              | 0.002 <sup>a</sup>     | 6 <sup>a</sup> | $3.621 \times 10^{-4}$ <sup>a</sup> | 0.485 <sup>a</sup>  | 0.819 <sup>a</sup>  | 0.006                  |
| Residuals                       | 0.349                  | 468            | $7.463 \times 10^{-4}$              |                     |                     |                        |
| HEMISPHERE * LINE * CUE         | 0.002 <sup>a</sup>     | 6 <sup>a</sup> | $4.147 \times 10^{-4}$ <sup>a</sup> | 0.680 <sup>a</sup>  | 0.666 <sup>a</sup>  | 0.009                  |
| HEMISPHERE * LINE * CUE * GROUP | 0.001 <sup>a</sup>     | 6 <sup>a</sup> | $2.448 \times 10^{-4}$ <sup>a</sup> | 0.401 <sup>a</sup>  | 0.878 <sup>a</sup>  | 0.005                  |
| Residuals                       | 0.286                  | 468            | $6.102 \times 10^{-4}$              |                     |                     |                        |

Supplementary Table 13.

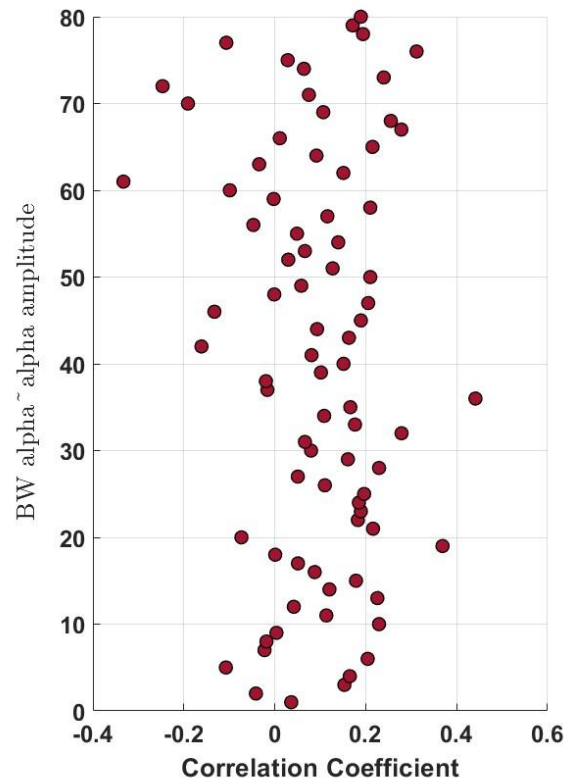

**Supplementary Figure S1. Trial-by-trial fluctuations in backward waves predict alpha band amplitude.**

We examined the relationship between alpha band amplitude and the traveling waves' power. In line with recent findings, we observed a positive and significant association between these measures (mean  $r = 0.09$ ,  $t_{79} = 6.27$ ,  $p < 0.01$ ). This supports the main text results, showing that backward alpha band waves predict the degree of alpha band oscillation modulation driven by prior knowledge. These findings highlight a potential functional role for backward waves in shaping posterior alpha band activity levels.

## Laplacian Control Analysis

We confirmed that this relationship was not driven by spatial leakage or volume conduction by applying a surface Laplacian filter to the EEG signal before computing alpha band traveling waves (see S1). As in the original analysis, we conducted two ANCOVAs using CUE (low, neutral, high probability), LINE (1–4; distance from the midline), and HEMISPHERE (contralateral, ipsilateral) as factors, with CRITERION SHIFT entered as a covariate. In the first ANCOVA, backward (BW) waves served as the dependent variable, whereas in the second, forward (FW) waves were used as the dependent variable. The ANCOVA on alpha band backward waves revealed a significant three-way interaction between CRITERION SHIFT, HEMISPHERE, and CUE ( $F_{2,156} = 3.23$ ,  $p = 0.04$ ). To clarify this effect, we examined the relationship between CUE and CRITERION SHIFT separately for each hemisphere. A significant CUE  $\times$  CRITERION SHIFT interaction emerged in the contralateral hemisphere ( $F_{2,156} = 3.33$ ,  $p = 0.04$ ), whereas no such effect was observed in the ipsilateral hemisphere ( $F_{2,156} = 1.03$ ,  $p = 0.36$ ). Post-hoc analyses confirmed that prestimulus contralateral BW waves predicted the extent of criterion modulation in the low-probability condition (Pearson  $r = 0.31$ ,  $p < 0.01$ ; Spearman  $\rho = 0.42$ ,  $p < 0.01$ ; Kendall  $\tau = 0.28$ ,  $p < 0.01$ ; Pearson  $BF_{10} = 7.09$ , Kendall  $BF_{10} = 13.52$ ), in the high-probability condition (Pearson  $r = 0.24$ ,  $p = 0.03$ ; Spearman  $\rho = 0.34$ ,  $p < 0.01$ ; Kendall  $\tau = 0.23$ ,  $p < 0.01$ ;  $BF_{10} = 1.38$  and  $15.39$ ), and also in the neutral condition (Pearson  $r = 0.25$ ,  $p = 0.03$ ; Spearman  $\rho = 0.36$ ,  $p < 0.01$ ; Kendall  $\tau = 0.24$ ,  $p < 0.01$ ;  $BF_{10} = 1.53$  and  $9.21$ ). In contrast, the second ANCOVA on prestimulus FW waves did not reveal any significant effect of the covariate CRITERION SHIFT, nor any interaction involving this covariate (all  $F < 2.73$ , all  $p > 0.07$ ). Finally, we replicated the reported association between alpha band backward waves and the modulation of parieto-occipital alpha amplitude after Laplacian filtering (Pearson  $r = 0.32$ ,  $p < 0.01$ ; Spearman  $\rho = 0.31$ ,  $p < 0.01$ ; Kendall  $\tau = 0.204$ ,  $p < 0.01$ ; Pearson  $BF_{10} = 7.47$ , Kendall  $BF_{10} = 4.92$ ). Consistent with the original mediation analysis, we again observed a positive indirect effect, indicating that the influence of backward waves on decision criterion was mediated by the concurrent modulation of alpha power (Indirect effect = 0.30, 95% CI = [0.08, 0.71]). Taken together, these results demonstrate that the link between backward alpha band traveling waves, alpha amplitude modulation, and criterion shifts is robust to spatial filtering, reinforcing the functional role of backward waves in mediating the impact of prior expectations on perceptual decision-making.
