# Supplementary material for: Backward alpha band oscillations shape perceptual bias under probabilistic cues
Source: Springer Nature journal article supplement (doi:10.1038/s42003-026-09559-1), 2026-01-21
Supplement: MOESM2 [file 42003_2026_9559_MOESM2_ESM.pdf]

## **Description of Additional Supplementary File**

File name: Supplementary Data 1-4

Description: numerical source data underlying all graphs and charts
