# Supplementary material for: Backward alpha band oscillations shape perceptual bias under probabilistic cues
Source: Springer Nature journal article supplement (doi:10.1038/s42003-026-09559-1), 2026-01-21
Supplement: MOESM3 [file 42003_2026_9559_MOESM3_ESM.xlsx]

## Sheet: SUPPLEMENTARY DATA 1
C conservative	C Neutral	C Liberal	d' conservative	d' neutral	d' liberal
0.735158	0.601325	-0.285268	0.800528	0.98184	0.817717
0.465822	0.212665	0.0243176	1.68902	1.86207	1.59973
-0.0813735	-0.266309	-0.591673	1.48562	1.20623	0.936164
0.532605	0.227417	-0.0148446	0.983002	1.12844	1.1547
0.136489	0.308917	-0.220326	1.21021	1.46922	1.11044
0.0392997	-0.134573	-0.381432	0.474364	0.368132	0.762864
0.546768	0.597482	-0.0010512	1.25809	1.58302	0.500315
0.89692	0.887493	0.760073	1.03646	0.738806	0.800577
0.937934	0.601325	0.0326232	0.84588	0.98184	0.964741
0.437088	0.258564	-0.0340264	1.03873	0.849192	0.651516
-0.0423083	0.0347079	0.0893313	0.411934	0.637663	0.629169
0.90948	1.14853	0.819362	2.52122	2.66187	2.1403
0.851215	0.563019	-0.120668	1.11897	1.51409	1.36635
0.576466	0.566676	0.684483	1.98491	1.45472	1.95243
0.0413998	-0.0504858	-0.190309	1.30545	1.26535	1.22707
0.180856	0.217089	0.139836	1.48673	1.22563	1.04362
0.0309212	-0.0158835	-0.00388773	1.48925	1.06795	1.54332
-0.17948	-0.0953062	-0.263273	2.7954	2.58737	2.69309
0.690915	0.609484	0.229279	2.41182	2.31868	2.43799
0.885423	0.654393	0.350647	1.44061	1.08797	1.46525
0.950774	0.782243	0.921575	1.31808	0.832273	1.63562
0.092281	-0.298677	-0.426321	2.07612	2.18063	1.97766
1.39169	1.45626	0.95411	0.293288	0.625123	0.412503
0.247686	0.315386	0.188426	2.13696	2.28598	2.59533
0.450258	0.379509	0.164049	1.1477	0.979829	1.32027
0.399944	0.0932317	-0.322708	1.38335	0.977914	1.4028
0.757525	0.993505	1.02765	1.43284	1.3134	1.42347
-0.209746	-0.103902	-0.198031	1.00792	0.76587	0.643243
0.762753	0.607365	0.378002	1.85574	1.71574	1.56472
0.374802	0.256185	0.175016	1.68684	2.4181	2.32946
0.555884	0.474553	0.0807894	1.60998	1.56469	1.06107
1.43187	1.79329	1.3563	0.697194	1.49952	0.441758
0.43955	0.430787	0.124059	1.46256	1.53518	1.28742
0.347169	0.221735	0.262026	1.91699	1.74102	2.37249
0.702064	0.465487	0.32017	1.00836	0.633039	0.739654
0.931356	0.68655	0.118292	2.62009	2.16455	1.78768
1.36312	0.455176	-0.162317	0.834687	0.910351	1.17108
0.269928	0.0388926	-0.0132612	1.29724	1.66106	0.872972
0.691371	0.308029	0.051725	0.968885	1.28967	1.54491
2.11513	1.07061	-0.18747	0.921395	0.292361	0.178024
0.894695	0.470154	-0.44306	1.03201	0.719498	0.721566
0.911093	0.995278	0.549095	1.33217	2.59923	2.2232
1.09684	0.358161	-0.830962	0.426988	1.10438	1.41474
0.669253	0.405556	-0.340451	0.530673	0.844096	0.779241
0.56131	0.138268	-0.156793	2.44592	2.36359	2.63431
0.753789	0.0236933	-0.957524	1.01103	1.70259	2.01339
1.21974	0.740751	-0.371298	1.03929	0.872824	0.580701
1.47747	0.704442	-1.24331	0.67789	1.50787	0.551776
0.546768	0.308029	-0.0710975	1.25809	1.28967	1.46549
0.667158	0.238552	0.176064	2.45933	1.70739	2.13796
0.238954	0.0630677	-0.256056	1.23529	1.03824	1.09557
1.01669	0.926726	0.181269	1.53516	2.41152	1.804
1.18879	-0.205291	-0.615517	0.842045	1.02616	0.817178
0.222684	-0.206952	-0.451678	1.14763	1.33608	0.903357
-0.17	-0.15	-0.19	1.19	0.8	0.62
0.798916	0.668865	0.00948899	0.928044	0.949674	0.65081
1.22207	0.208103	-0.555471	0.277603	-0.0281492	0.173711
0.728126	-0.157006	-0.777335	1.37405	1.68033	0.971206
0.716422	0.61148	0.257792	1.51505	1.55502	1.65096
1.12602	0.42475	-0.256056	0.824629	1.23756	1.09557
1.11744	0.735477	0.138851	0.586517	0.434773	0.568748
0.659885	0.202104	-0.801033	1.40198	1.2556	1.0186
-0.193631	-0.460762	-0.464022	1.37943	1.36588	1.59783
0.657604	0.355771	0.0228513	1.39742	1.68522	1.38171
1.10175	0.500715	-0.42294	2.28571	2.29898	1.87587
-0.174238	-0.407349	-0.348676	1.18707	1.09103	1.02758
0.830339	0.640994	0.46431	1.90786	2.25566	1.96792
1.20486	0.926726	0.433479	2.07949	2.41152	1.81254
0.77972	0.152401	-0.204613	1.06123	1.27848	1.43921
-0.0332113	-0.47704	-0.680437	1.05859	1.23041	1.36087
-0.148947	-0.0806123	-0.0238119	2.02283	1.7445	2.07189
0.231054	0.483522	-0.0365538	1.88952	2.33336	1.8398
0.371584	-0.0221541	-0.363235	1.77316	1.95003	2.49316
0.605967	0.420871	0.381409	1.12973	1.34275	1.02874
0.839448	0.360465	0.064784	2.80391	3.11769	3.3492
0.743113	0.75602	0.465239	1.73341	1.78837	1.39025
1.66652	1.35657	1.24275	1.82549	1.40529	0.823376
0.353733	0.305441	-0.260335	1.32869	1.28067	1.98714
0.829655	-0.0140746	-0.569369	0.534296	0.416205	0.468949
0.507263	0.222012	-0.183981	1.17908	0.720354	0.866174

## Sheet: SUPPLEMENTARY DATA 2
Prior bias	BW C1	BW C2	BW C3	FW C1	FW C2	FW C3
1.02043	0.586962	0.451958	0.606433	0.297623	0.42017	0.279306
0.441505	0.354475	0.281091	0.228283	0.532858	0.604015	0.648315
0.510299	0.354144	0.388859	0.329444	0.261852	0.22467	0.297505
0.54745	0.303401	0.292531	0.300254	0.394911	0.428769	0.404474
0.356816	0.461722	0.434794	0.419242	0.174648	0.229538	0.236221
0.420732	0.299014	0.403236	0.4363	0.665911	0.571571	0.531842
0.547819	0.549682	0.577868	0.585996	0.354162	0.295439	0.298392
0.136847	0.315154	0.346345	0.303138	0.429774	0.391526	0.375397
0.90531	0.563001	0.516347	0.552698	0.306764	0.352251	0.329707
0.471115	0.456151	0.516583	0.440967	0.195955	0.162453	0.239907
-0.13164	0.269784	0.350935	0.335526	0.43157	0.346628	0.373361
0.0901174	0.263671	0.297516	0.24542	0.274524	0.215112	0.234738
0.971883	0.24075	0.301556	0.260995	0.420492	0.397678	0.389106
-0.108017	0.330039	0.336649	0.298569	0.0369212	0.0813393	0.106516
0.231709	0.303832	0.373254	0.343958	0.565405	0.505057	0.529259
0.0410201	0.336686	0.384591	0.40449	0.514598	0.469997	0.461335
0.0348089	0.532373	0.490691	0.434973	0.180864	0.193767	0.245527
0.0837928	0.673489	0.705956	0.658576	0.21333	0.166178	0.159555
0.461636	0.372012	0.305569	0.315908	0.220264	0.267088	0.295217
0.534776	0.314573	0.358056	0.363415	0.524671	0.489298	0.469229
0.029199	0.0157363	0.0693793	0.0542784	0.759572	0.707711	0.725985
0.518602	0.291739	0.300243	0.283765	0.248436	0.24717	0.234699
0.43758	0.313587	0.304429	0.300614	0.406634	0.449081	0.43174
0.0592604	0.453508	0.552424	0.538684	0.289811	0.229309	0.227758
0.286209	0.386934	0.462473	0.394457	0.287153	0.175275	0.276942
0.722652	0.158677	0.211462	0.128459	0.281827	0.228062	0.308514
-0.270125	0.206671	0.242388	0.220807	0.347639	0.309588	0.363522
-0.0117148	0.544543	0.54945	0.532049	0.209965	0.227387	0.230446
0.38475	0.361741	0.389853	0.362746	0.436839	0.418941	0.437572
0.199786	0.255368	0.268465	0.133645	0.568156	0.586664	0.651531
0.475094	0.26993	0.363979	0.337886	0.422647	0.330968	0.348635
0.0256	-0.165998	-0.122268	-0.101347	0.902769	0.870904	0.877927
0.31549	0.46284	0.477702	0.484763	0.289597	0.259131	0.256265
0.085143	0.127264	0.130914	0.186898	0.389219	0.37282	0.330854
0.381894	0.296144	0.255143	0.331925	0.28326	0.300888	0.274844
0.813064	0.481802	0.564573	0.481084	0.414002	0.328917	0.387618
1.52544	0.547186	0.485142	0.455705	0.185955	0.227843	0.255565
0.283189	0.349009	0.385798	0.34068	0.427237	0.417086	0.480007
0.639646	0.676185	0.664714	0.650088	0.289334	0.336064	0.292264
2.3026	0.243107	0.205924	0.217358	0.507554	0.534025	0.525028
1.33775	0.566369	0.589503	0.570504	0.39267	0.45792	0.448232
0.361998	0.513156	0.551585	0.524121	0.262244	0.217379	0.22825
1.9278	0.767623	0.860348	0.830899	0.16379	0.0582145	0.0371486
1.0097	0.262145	0.276529	0.244692	0.383545	0.409381	0.394798
0.718103	0.441674	0.389515	0.45358	0.526044	0.594511	0.494582
1.71131	0.30451	0.413887	0.466011	0.514487	0.417616	0.381832
1.59103	0.506808	0.457722	0.522057	0.378619	0.399521	0.363691
2.72078	0.439928	0.286203	0.344193	0.308919	0.47664	0.390864
0.617866	0.581325	0.541617	0.506861	0.279158	0.337522	0.387756
0.491094	0.46008	0.448279	0.403512	0.217291	0.260202	0.278397
0.49501	0.421621	0.400647	0.38094	0.242512	0.300206	0.306601
0.835418	0.486441	0.398813	0.364971	0.328122	0.39153	0.413766
1.80431	0.501828	0.549825	0.48344	0.272481	0.210078	0.29067
0.674362	0.577664	0.477801	0.531142	0.230556	0.308796	0.265198
0.02	0.0900378	0.195588	0.150655	0.286435	0.170663	0.205335
0.789427	0.430409	0.541602	0.413945	0.411034	0.325262	0.433505
1.77754	0.615894	0.579203	0.575906	0.196438	0.221576	0.19161
1.50546	0.386574	0.318029	0.397124	0.396108	0.426185	0.35589
0.45863	0.505799	0.473745	0.553121	0.10024	0.163602	0.097106
1.38208	0.439005	0.39049	0.432356	0.312602	0.39094	0.307756
0.97859	0.30333	0.31712	0.3434	0.205221	0.167695	0.196903
1.46092	0.362167	0.398294	0.350265	0.601813	0.537729	0.627078
0.270391	0.186034	0.150515	0.203393	0.499676	0.563533	0.455077
0.634753	0.576698	0.598391	0.499948	0.275994	0.302003	0.339023
1.52469	0.453832	0.445663	0.457941	0.356629	0.347241	0.311518
0.174438	0.383072	0.366596	0.373181	0.329932	0.34075	0.340147
0.366029	0.432371	0.440639	0.461188	0.292803	0.27828	0.261575
0.771383	0.558188	0.61468	0.626545	0.239131	0.194696	0.184934
0.984333	0.493259	0.474906	0.441185	0.180846	0.202997	0.246922
0.647225	0.311199	0.324386	0.325406	0.321848	0.304459	0.30403
-0.125135	0.153954	0.161515	0.156497	0.642641	0.616314	0.660639
0.267608	0.771404	0.767379	0.74787	0.130823	0.16138	0.15595
0.734819	0.35717	0.341534	0.401658	0.310865	0.323281	0.251227
0.224558	0.461102	0.510406	0.494548	0.307829	0.275553	0.287584
0.774664	0.367494	0.33228	0.275975	0.242181	0.254187	0.330864
0.277874	0.419193	0.433098	0.351514	0.291944	0.279837	0.331087
0.423778	0.267291	0.248521	0.310782	0.343403	0.385154	0.284382
0.614068	0.599098	0.604049	0.574115	0.236259	0.24105	0.313093
1.39902	0.625916	0.678797	0.65473	0.336758	0.327405	0.335345
0.691244	0.28199	0.309828	0.308741	0.300442	0.283773	0.294093

## Sheet: SUPPLEMENTARY DATA 3
	EMP												BEL
	FW						BW						FW						BW
	TIME 1	TIME 2	TIME 3	TIME 4	TIME 5	TIME 6	TIME 1	TIME 2	TIME 3	TIME 4	TIME 5	TIME 6	TIME 1	TIME 2	TIME 3	TIME 4	TIME 5	TIME 6	TIME 1	TIME 2	TIME 3	TIME 4	TIME 5	TIME 6
LINE	0.274507	0.288228	0.308844	0.317358	0.325933	0.327401	0.342641	0.331157	0.318694	0.323445	0.311633	0.305526	0.266433	0.275585	0.295403	0.308444	0.335182	0.321069	0.37219	0.375488	0.348241	0.337884	0.322067	0.321323
LINE	0.248836	0.256554	0.279945	0.295872	0.303302	0.298468	0.403273	0.389151	0.377887	0.373265	0.36599	0.360751	0.238862	0.234281	0.269776	0.283544	0.296698	0.28452	0.422827	0.432894	0.407493	0.397644	0.378081	0.380348
LINE	0.283903	0.291611	0.312504	0.323429	0.329739	0.322508	0.439497	0.435881	0.414105	0.402045	0.390627	0.382827	0.258652	0.251536	0.277384	0.286384	0.286854	0.273715	0.436122	0.44999	0.432112	0.40917	0.406984	0.411607
LINE	0.357511	0.370921	0.380468	0.396693	0.400154	0.400337	0.40848	0.399185	0.383583	0.362425	0.356621	0.349723	0.331873	0.332556	0.350798	0.359797	0.358997	0.344419	0.392631	0.392017	0.388097	0.368974	0.37907	0.383931
LINE	0.357719	0.358094	0.393911	0.399949	0.417702	0.392599	0.391049	0.380358	0.349259	0.344174	0.325516	0.344536	0.319434	0.323924	0.346116	0.358573	0.369113	0.334946	0.480609	0.471926	0.446639	0.416902	0.409876	0.428839
LINE	0.318434	0.317461	0.365484	0.373026	0.376124	0.366274	0.435608	0.430658	0.390364	0.376828	0.353257	0.348129	0.26244	0.261654	0.308335	0.315579	0.313209	0.301479	0.527045	0.519863	0.473482	0.467768	0.446479	0.436345
LINE	0.269148	0.278065	0.309282	0.319047	0.32296	0.31122	0.360041	0.365278	0.332037	0.320463	0.293032	0.26808	0.232214	0.22525	0.269146	0.279417	0.270028	0.253266	0.45192	0.43621	0.409359	0.411838	0.40045	0.380729
LINE	0.386132	0.385918	0.446179	0.434176	0.449883	0.478755	0.426341	0.429116	0.376526	0.377077	0.335888	0.292903	0.324927	0.342477	0.401487	0.40891	0.411938	0.438109	0.486217	0.480225	0.414504	0.424753	0.390675	0.353765
	FW						BW									FW		BW
	EMP	EMP	EMP	BEL	BEL	BEL	EMP	EMP	EMP	BEL	BEL	BEL				LEFT	RIGHT	LEFT	RIGHT
	CUE 1	CUE 2	CUE 3	CUE 1	CUE 2	CUE 3	CUE 1	CUE 2	CUE 3	CUE 1	CUE 2	CUE 3			EMP	0.298376	0.332366	0.332267	0.548451
LINE	0.384941	0.381664	0.386437	0.357282	0.347566	0.334372	0.373871	0.38828	0.367857	0.366163	0.390687	0.39551			EMP	0.511918	0.595063	0.342689	0.28795
LINE	0.304056	0.315406	0.312385	0.281524	0.269024	0.266714	0.413477	0.410637	0.408377	0.412013	0.437594	0.423385			EMP	0.112784	0.261342	0.442907	0.357483
LINE	0.278133	0.282861	0.280494	0.264094	0.267091	0.272655	0.377577	0.379415	0.378166	0.398348	0.410016	0.40128			EMP	0.200824	0.409385	0.253384	0.298728
LINE	0.306426	0.306162	0.308548	0.292774	0.302277	0.306007	0.320688	0.322539	0.32332	0.346929	0.35064	0.341028			EMP	0.0536967	0.213469	0.419511	0.438586
LINE	0.390669	0.381601	0.387717	0.346029	0.350302	0.329722	0.348165	0.369503	0.349778	0.437412	0.444942	0.445041			EMP	0.413967	0.589775	0.45574	0.379517
LINE	0.354626	0.348434	0.355342	0.292571	0.298677	0.290099	0.38667	0.398813	0.381939	0.477916	0.479896	0.477679			EMP	0.398182	0.315998	0.474321	0.571182
LINE	0.306035	0.293526	0.3053	0.252516	0.257466	0.254678	0.317526	0.331471	0.320469	0.413275	0.413212	0.418766			EMP	0.470668	0.398899	0.35373	0.321546
LINE	0.443141	0.413477	0.433903	0.373917	0.38606	0.403946	0.363328	0.387871	0.367727	0.437762	0.427903	0.409406			EMP	0.358406	0.329574	0.426762	0.544015
															EMP	0.095828	0.199439	0.576819	0.471234
															EMP	0.303126	0.383853	0.332687	0.318748
															EMP	0.27656	0.241458	0.234609	0.268869
															EMP	0.17002	0.402425	0.437927	0.267767
															EMP	0.0920736	0.0749254	0.206822	0.321753
															EMP	0.237128	0.53324	0.499337	0.340348
															EMP	0.436078	0.481976	0.435533	0.375256
															EMP	0.24077	0.206719	0.505676	0.486012
															EMP	0.199203	0.179688	0.647567	0.67934
															EMP	0.268137	0.260857	0.334182	0.331163
															EMP	0.484338	0.4944	0.303173	0.345348
															EMP	0.410285	0.73109	0.290475	0.0464647
															EMP	0.3025	0.243435	0.22685	0.291916
															EMP	0.39332	0.429152	0.327139	0.30621
															EMP	0.0873528	0.248959	0.529397	0.514872
															EMP	0.180128	0.246457	0.400441	0.414621
															EMP	0.273799	0.272801	0.180178	0.166199
															EMP	0.305881	0.340249	0.376865	0.223289
															EMP	0.263742	0.222599	0.571336	0.542014
															EMP	0.374253	0.431117	0.453516	0.371447
															EMP	0.501487	0.602117	0.312273	0.21916
															EMP	0.265841	0.367417	0.284143	0.323932
															EMP	0.87964	0.883867	-0.148605	-0.129871
															EMP	0.334809	0.268331	0.343088	0.475102
															EMP	0.341	0.364297	0.184288	0.148359
															EMP	0.364409	0.286331	0.371696	0.294404
															EMP	0.347379	0.376845	0.334438	0.509153
															EMP	0.260118	0.223121	0.527303	0.496011
															EMP	0.42234	0.441443	0.327347	0.358496
															EMP	0.440801	0.305887	0.639046	0.663663
															EMP	0.453878	0.522202	0.333825	0.22213
															BEL	0.415646	0.432941	0.424131	0.575459
															BEL	0.350748	0.235958	0.3349	0.529621
															BEL	0.105609	0.0863844	0.808652	0.819623
															BEL	0.434405	0.395908	0.323911	0.261122
															BEL	0.642937	0.538379	0.253085	0.428256
															BEL	0.230726	0.437978	0.551613	0.394802
															BEL	0.307278	0.38061	0.371518	0.495529
															BEL	0.247277	0.392141	0.313162	0.356774
															BEL	0.364279	0.334812	0.413607	0.543267
															BEL	0.264753	0.251963	0.453573	0.437291
															BEL	0.168003	0.283106	0.413167	0.40107
															BEL	0.469009	0.377806	0.336242	0.416742
															BEL	0.167819	0.257743	0.298633	0.511698
															BEL	0.231474	0.268183	0.474462	0.528869
															BEL	0.138085	0.220811	0.127766	0.145427
															BEL	0.390641	0.389934	0.495003	0.461985
															BEL	0.318328	0.203208	0.412845	0.590334
															BEL	0.266853	0.392728	0.319082	0.367242
															BEL	0.211483	0.120316	0.436524	0.510889
															BEL	0.111201	0.337099	0.488672	0.420617
															BEL	0.0574188	0.18994	0.323947	0.321283
															BEL	0.530114	0.588874	0.270158	0.370242
															BEL	0.207124	0.506095	0.186499	0.179981
															BEL	0.326712	0.305673	0.479632	0.558346
															BEL	0.395157	0.338463	0.295294	0.452479
															BEL	0.357461	0.336943	0.303584	0.374283
															BEL	0.221107	0.277552	0.479602	0.444733
															BEL	0.157475	0.206254	0.495272	0.599805
															BEL	0.370095	0.210255	0.370592	0.469783
															BEL	0.329009	0.310113	0.218613	0.320331
															BEL	0.449344	0.639865	0.26524	0.157322
															BEL	0.297	0.149385	0.580307	0.762218
															BEL	0.329741	0.295125	0.443005	0.366787
															BEL	0.47001	0.290322	0.331528	0.488685
															BEL	0.278529	0.275744	0.33409	0.32525
															BEL	0.0817827	0.300956	0.496995	0.401268
															BEL	0.258026	0.337646	0.230193	0.275531
															BEL	0.549723	0.263468	0.441762	0.592421
															BEL	0.263002	0.333169	0.737243	0.653148
															BEL	0.105885	0.292769	0.244538	0.300187

## Sheet: SUPPLEMENTARY DATA 4
BW right	BW left	FW right	FW left	criterion	Alpha Modulation
0.548451	0.332267	0.332366	0.298376	1.02043	0.0971338
0.28795	0.342689	0.595063	0.511918	0.441505	-0.114614
0.357483	0.442907	0.261342	0.112784	0.510299	-0.0139125
0.298728	0.253384	0.409385	0.200824	0.54745	0.00743959
0.438586	0.419511	0.213469	0.0536967	0.356816	-0.244115
0.379517	0.45574	0.589775	0.413967	0.420732	0.05732
0.571182	0.474321	0.315998	0.398182	0.547819	-0.0823345
0.321546	0.35373	0.398899	0.470668	0.136847	0.0718
0.544015	0.426762	0.329574	0.358406	0.90531	-0.0621109
0.471234	0.576819	0.199439	0.095828	0.471115	-0.175731
0.318748	0.332687	0.383853	0.303126	-0.13164	-0.0585
0.268869	0.234609	0.241458	0.27656	0.0901174	-0.0789285
0.267767	0.437927	0.402425	0.17002	0.971883	-0.031412
0.321753	0.206822	0.0749254	0.0920736	-0.108017	-0.253221
0.340348	0.499337	0.53324	0.237128	0.231709	-0.086321
0.375256	0.435533	0.481976	0.436078	0.0410201	-0.2352
0.486012	0.505676	0.206719	0.24077	0.0348089	0.0484171
0.67934	0.647567	0.179688	0.199203	0.0837928	-0.3752
0.331163	0.334182	0.260857	0.268137	0.461636	-0.1034
0.345348	0.303173	0.4944	0.484338	0.534776	0.0199769
0.0464647	0.290475	0.73109	0.410285	0.029199	-0.0503
0.291916	0.22685	0.243435	0.3025	0.518602	-0.0174504
0.30621	0.327139	0.429152	0.39332	0.43758	0.0710976
0.514872	0.529397	0.248959	0.0873528	0.0592604	-0.0702868
0.414621	0.400441	0.246457	0.180128	0.286209	0.0736
0.166199	0.180178	0.272801	0.273799	0.722652	0.0717
0.223289	0.376865	0.340249	0.305881	-0.270125	0.0353538
0.542014	0.571336	0.222599	0.263742	-0.0117148	-0.154168
0.371447	0.453516	0.431117	0.374253	0.38475	-0.0712285
0.21916	0.312273	0.602117	0.501487	0.199786	-0.00589481
0.323932	0.284143	0.367417	0.265841	0.475094	0.103163
-0.129871	-0.148605	0.883867	0.87964	0.0256	-0.25502
0.475102	0.343088	0.268331	0.334809	0.31549	-0.126861
0.148359	0.184288	0.364297	0.341	0.085143	-0.525738
0.294404	0.371696	0.286331	0.364409	0.381894	-0.182749
0.509153	0.334438	0.376845	0.347379	0.813064	-0.0278126
0.496011	0.527303	0.223121	0.260118	1.52544	0.109094
0.358496	0.327347	0.441443	0.42234	0.283189	-0.0733143
0.663663	0.639046	0.305887	0.440801	0.639646	-0.200578
0.22213	0.333825	0.522202	0.453878	2.3026	-0.0842
0.575459	0.424131	0.432941	0.415646	1.33775	0.305064
0.529621	0.3349	0.235958	0.350748	0.361998	0.279489
0.819623	0.808652	0.0863844	0.105609	1.9278	0.138184
0.261122	0.323911	0.395908	0.434405	1.0097	0.1493
0.428256	0.253085	0.538379	0.642937	0.718103	0.267501
0.394802	0.551613	0.437978	0.230726	1.71131	0.2407
0.495529	0.371518	0.38061	0.307278	1.59103	0.362944
0.356774	0.313162	0.392141	0.247277	2.72078	0.145286
0.543267	0.413607	0.334812	0.364279	0.617866	0.135858
0.437291	0.453573	0.251963	0.264753	0.491094	0.4211
0.40107	0.413167	0.283106	0.168003	0.49501	0.333475
0.416742	0.336242	0.377806	0.469009	0.835418	0.50165
0.511698	0.298633	0.257743	0.167819	1.80431	0.212851
0.528869	0.474462	0.268183	0.231474	0.674362	0.604734
0.145427	0.127766	0.220811	0.138085	0.02	0.1208
0.461985	0.495003	0.389934	0.390641	0.789427	0.364588
0.590334	0.412845	0.203208	0.318328	1.77754	0.57528
0.367242	0.319082	0.392728	0.266853	1.50546	0.169496
0.510889	0.436524	0.120316	0.211483	0.45863	0.327259
0.420617	0.488672	0.337099	0.111201	1.38208	0.2998
0.321283	0.323947	0.18994	0.0574188	0.97859	0.189526
0.370242	0.270158	0.588874	0.530114	1.46092	0.2509
0.179981	0.186499	0.506095	0.207124	0.270391	0.15672
0.558346	0.479632	0.305673	0.326712	0.634753	0.379358
0.452479	0.295294	0.338463	0.395157	1.52469	0.172943
0.374283	0.303584	0.336943	0.357461	0.174438	0.355929
0.444733	0.479602	0.277552	0.221107	0.366029	0.170226
0.599805	0.495272	0.206254	0.157475	0.771383	0.388984
0.469783	0.370592	0.210255	0.370095	0.984333	0.482268
0.320331	0.218613	0.310113	0.329009	0.647225	0.110221
0.157322	0.26524	0.639865	0.449344	-0.125135	0.229467
0.762218	0.580307	0.149385	0.297	0.267608	0.179753
0.366787	0.443005	0.295125	0.329741	0.734819	0.179841
0.488685	0.331528	0.290322	0.47001	0.224558	0.703307
0.32525	0.33409	0.275744	0.278529	0.774664	0.111018
0.401268	0.496995	0.300956	0.0817827	0.277874	0.576689
0.275531	0.230193	0.337646	0.258026	0.423778	0.344232
0.592421	0.441762	0.263468	0.549723	0.614068	0.407098
0.653148	0.737243	0.333169	0.263002	1.39902	0.207829
0.300187	0.244538	0.292769	0.105885	0.691244	0.615803
